# Supplementary material for: Surface Modification of PHBV Fibrous Scaffold via Lithium Borohydride Reduction
Source: MDPI journal article supplement (doi:10.3390/ma15217494), 2022-10-25
Supplement: s1 [file s1]

## Supporting Information

### **Surface modification of PHBV fibrous scaffold via lithium borohydride reduction**

Paweł Chaber <sup>1,\*</sup>, Grzegorz Tylko <sup>2</sup>, Jakub Włodarczyk <sup>1</sup>, Paweł Nitschke <sup>1</sup>, Anna Hercog <sup>1</sup>, Sebastian Jurczyk <sup>3</sup>, Jakub Rech <sup>4</sup>, Jerzy Kubacki <sup>5</sup>, Grażyna Adamus <sup>1,\*</sup>

<sup>1</sup> Centre of Polymer and Carbon Materials, Polish Academy of Sciences; M. Curie-Skłodowska 34, 41-819 Zabrze, Poland; <sup>2</sup> Department of Cell Biology and Imaging, Institute of Zoology and Biomedical Research, Faculty of Biology, Jagiellonian University; Gronostajowa 9, 30-387 Kraków, Poland; <sup>3</sup> Institute for Engineering of Polymer Materials and Dyes, Łukasiewicz Research Network, Marii Skłodowskiej-Curie 55, 87-100 Toruń, Poland; <sup>4</sup> Department of Biotechnology and Genetic Engineering, Faculty of Pharmaceutical Sciences in Sosnowiec, Medical University of Silesia, Poniatowskiego 15, 40-055 Katowice, Poland; <sup>5</sup> University of Silesia in Katowice, Faculty of Science and Technology, Institute of Physics, 75 Pułku Piechoty 1, 41-500 Chorzów, Poland

Corresponding authors: pchaber@cmpw-pan.pl; gadamus@cmpw-pan.pl

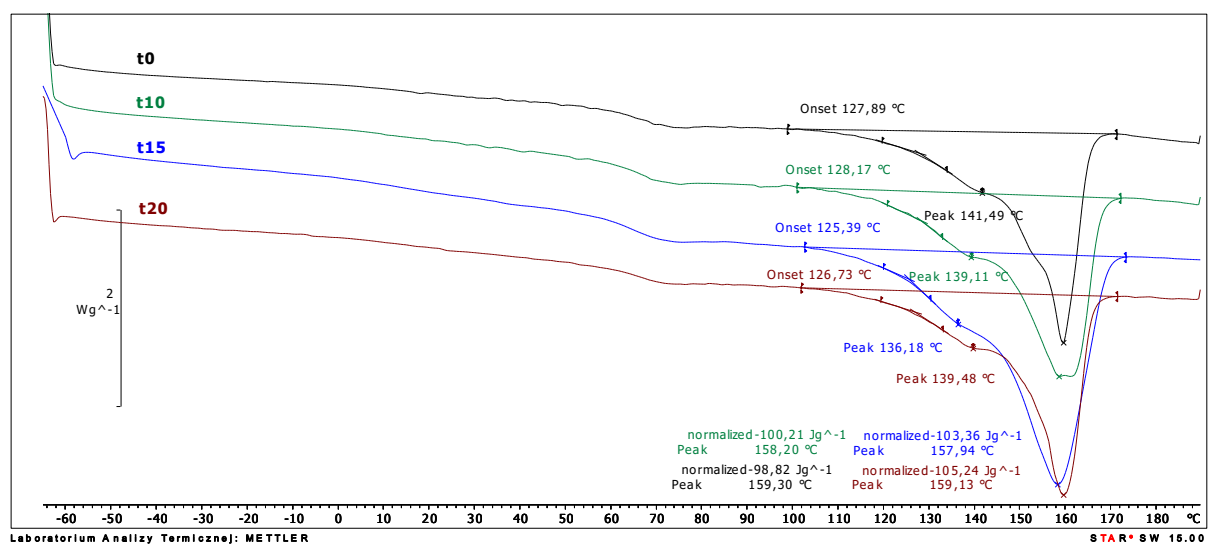

**Figure S1.** DSC first heating thermograms of the untreated and LiBH<sub>4</sub>-treated PHBV fibrous mats.

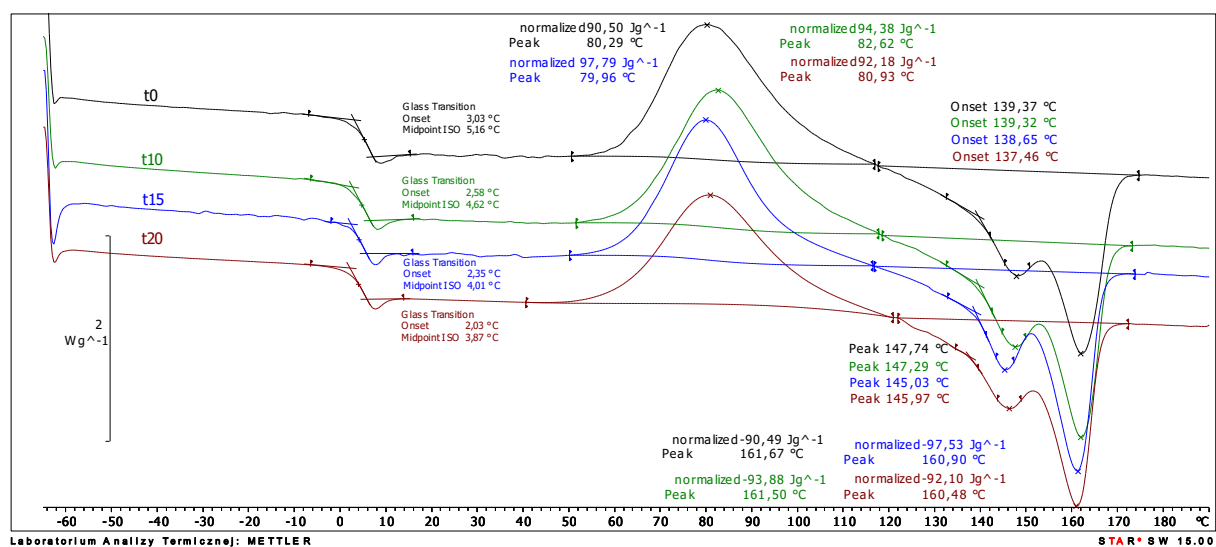

**Figure S2.** DSC second heating thermograms of the untreated and LiBH<sub>4</sub>-treated PHBV fibrous mats.

**Table S1.** Thermal properties of the untreated and LiBH<sub>4</sub>-treated PHBV polymer as determined from the second DSC heating thermograms

| Sample | 2 <sup>nd</sup> Heating <sup>a</sup> |               |               |                    |                |
|--------|--------------------------------------|---------------|---------------|--------------------|----------------|
|        | $T_g$ [°C]                           | $T_{m1}$ [°C] | $T_{m2}$ [°C] | $\Delta H_m$ [J/g] | $\chi_c^b$ [%] |
| PHBV0  | 5.2                                  | 147.7         | 161.7         | 89.8               | 70.2           |
| PHBV10 | 4.6                                  | 147.3         | 161.5         | 93.3               | 72.9           |
| PHBV15 | 4.0                                  | 145.0         | 160.9         | 97.2               | 75.9           |
| PHBV20 | 3.7                                  | 146.0         | 160.5         | 93.8               | 73.3           |

<sup>a</sup> The heating rate was 20°C/min in the temperature range from –65 to 190°C; <sup>b</sup>  $\Delta H_{m100}$  = 128.0 J/g

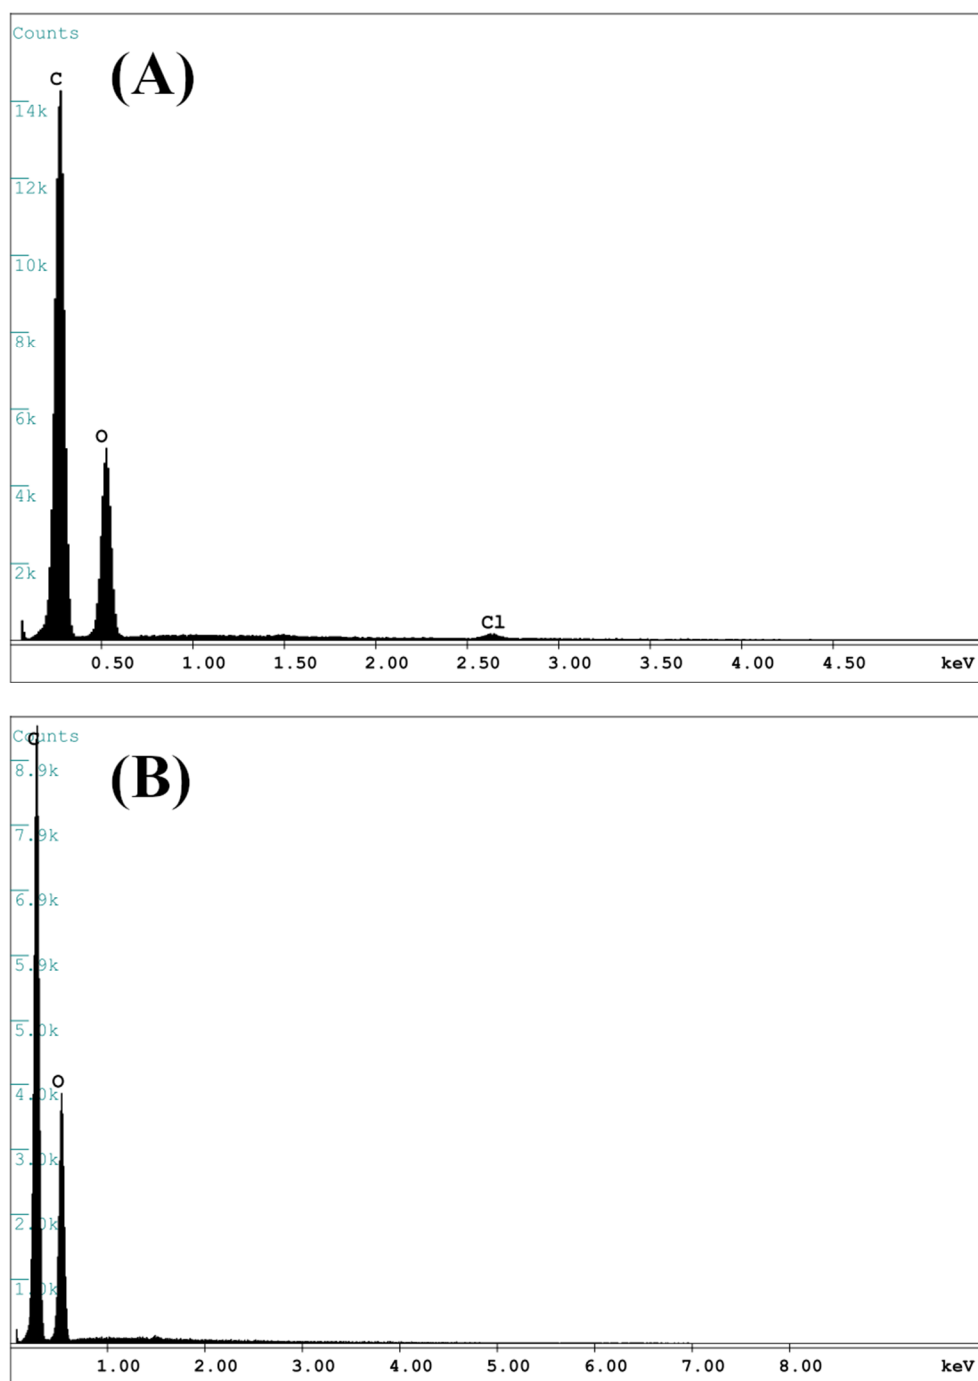

**Figure S3.** Representative EDS spectra obtained by X-ray microanalysis of (A) PHBV15 mat before washing it with ethanol and (B) PHBV15 mat after ethanol washing. Please note that ethanol washing effectively removes LiCl from the material surface.

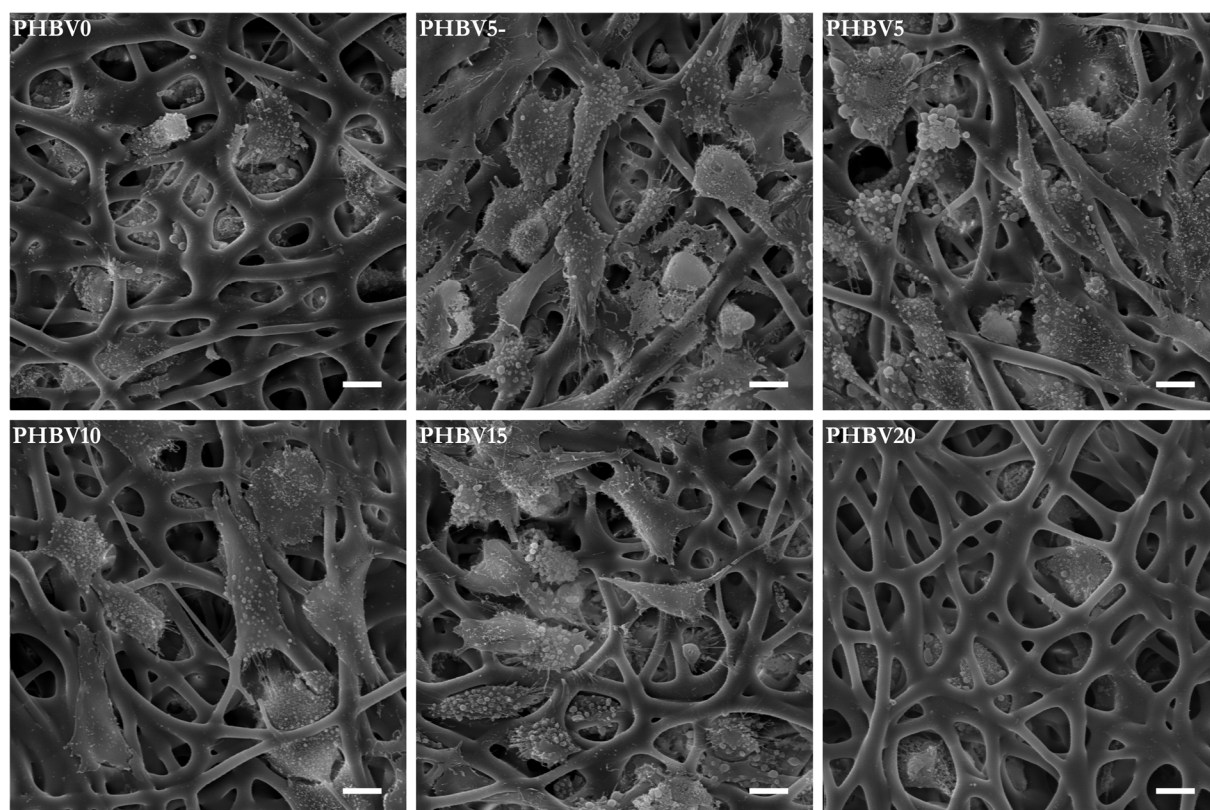

**Figure S4.** SEM images of SaOS-2 cells cultured for 7 days on the different modified PHBV fibers (scale bars are all 10  $\mu\text{m}$ ).
